# Supplementary material for: Functionalization of nanomaterials by non-thermal large area atmospheric pressure plasmas: application to flexible dye-sensitized solar cells
Source: Royal Society of Chemistry journal article supplement (doi:10.1039/c3nr01889j), 2013-01-01
Supplement: c3nr01889j.pdf [file c3nr01889j.pdf]

## Supporting Information

# Functionalization of nanomaterial by non-thermal large area atmospheric pressure plasmas: application to flexible dye-sensitized solar cells

Heesoo Jung,<sup>a</sup> Jaeyoung Park,<sup>b</sup> Eun Sang Yoo,<sup>c</sup> Gil-Sang Han,<sup>c</sup> Hyun Suk Jung,<sup>\*c</sup> Min Jae Ko,<sup>d</sup> Sanghoo Park,<sup>e</sup> and Wonho Choe<sup>\*e</sup>

---

<sup>a</sup>Agency for Defense Development, 160, Bugyuseong-daero 488beon-gil, Yoseong-gu, Daejeon 305-152, Korea

<sup>b</sup>5771 La Jolla Corona Drive, La Jolla, CA 92037, USA

<sup>c</sup>School of Advanced Materials Science and Engineering, Sungkyunkwan University, 2066 Seobu-ro, Janan-gu, Suwon-si, Gyeonggi-do 440-746, Korea. Tel: +82-31-290-7403; E-mail: [hsjung1@skku.ac.kr](mailto:hsjung1@skku.ac.kr)

<sup>d</sup>Photo-Electronic Hybrids Research Center, Korea Institute of Science and Technology, Hwarangno 14-gil 5, Seongbuk-gu, Seoul 136-791, Korea

<sup>e</sup>Department of Physics, Korea Advanced Institute of Science and Technology, 291 Daehak-ro, Yuseong-gu, Daejeon 305-701, Korea. Tel: +82+42-350-2539; E-mail: [wchoe@kaist.ac.kr](mailto:wchoe@kaist.ac.kr)

For the preparation of the TiO<sub>2</sub> paste that contains ethyl cellulose, 3 g of TiO<sub>2</sub> nanoparticles, 0.5 ml of acetic acid, 20 mL of ethanol, 2.5 mL of deionized water, 9.4 mL of alpha-terpinol, 0.5 g of ethyl cellulose were mixed by using three rolls milling machine. In this experiment, DSSC performance for TiO<sub>2</sub> film based on ethyl cellulose paste is slightly higher than the other counterparts. This indicates that the APP treatment is capable of decomposing polymeric binders such as ethyl cellulose.

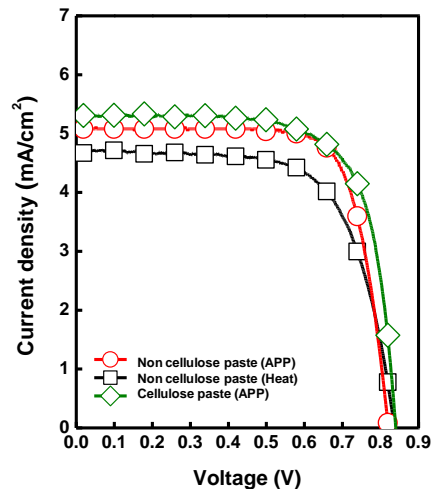

Figure S1. Photocurrent density-voltage characteristic curves of the APP treated DSSCs and heat treated DSSC (AM 1.5G). The thickness of each TiO<sub>2</sub> film was about 2.2  $\mu\text{m}$ .

| Condition<br>Parameter    | Heat<br>(non cellulose paste) | APP<br>(non cellulose paste) | APP<br>(cellulose paste) |
|---------------------------|-------------------------------|------------------------------|--------------------------|
| Jsc (mA/cm <sup>2</sup> ) | 4.71                          | 5.09                         | 5.30                     |
| Voc (V)                   | 0.84                          | 0.82                         | 0.84                     |
| FF (%)                    | 67                            | 75                           | 72                       |
| Efficiency (%)            | 2.67                          | 3.15                         | 3.21                     |

Table S1. Photovoltaic performance of the APP treated DSSC and heat treated DSSC under 1 sun illumination (AM 1.5G).
